# Supplementary material for: Senescent Tumor Cells Build a Cytokine Shield in Colorectal Cancer
Source: Adv Sci (Weinh). 2021 Jan 4;8(4):2002497. doi: 10.1002/advs.202002497 (PMC7887594; doi:10.1002/advs.202002497)
Supplement: Supplementary file 1 — Supporting Information [file ADVS-8-2002497-s001.pdf]

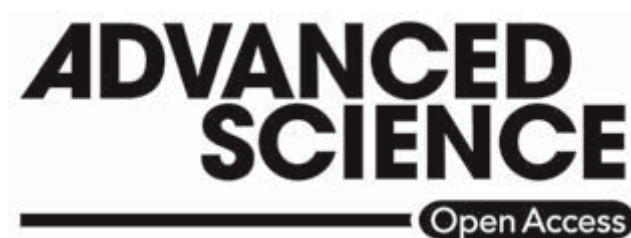

## Supporting Information

for *Adv. Sci.*, DOI: 10.1002/advs.202002497

### **Senescent Tumor Cells Build a Cytokine Shield in Colorectal Cancer**

*Yong Won Choi, Young Hwa Kim, Seung Yeop Oh, Kwang Wook Suh, Young-Sam Kim, Ga-Yeon Lee, Jung Eun Yoon, Soon Sang Park, Young-Kyoung Lee, Yoo Jung Park, Hong Seok Kim, So Hyun Park, Jang-Hee Kim,\* and Tae Jun Park\**

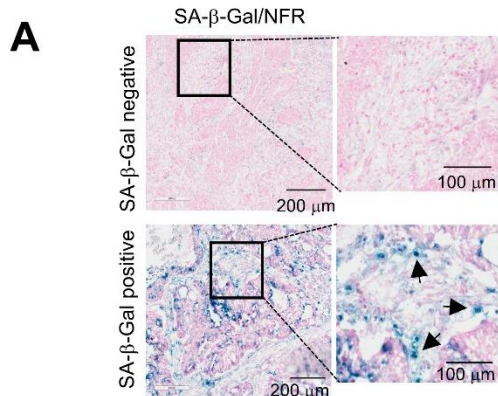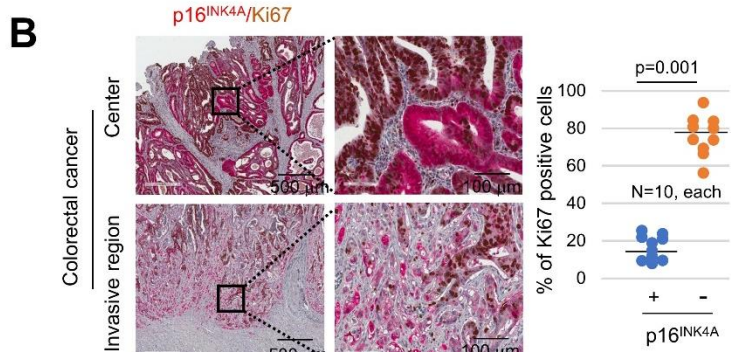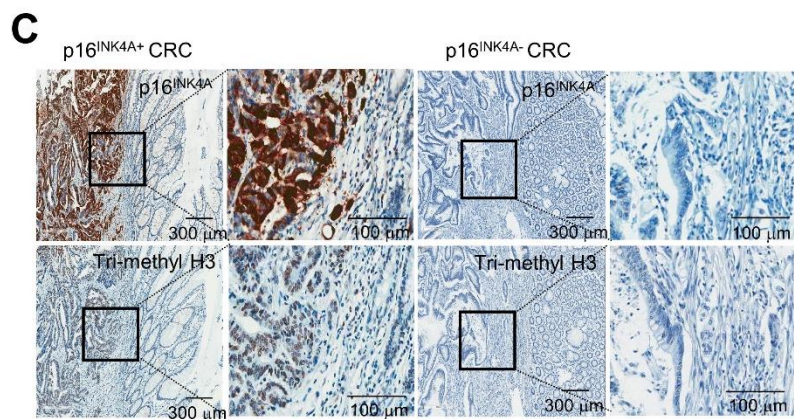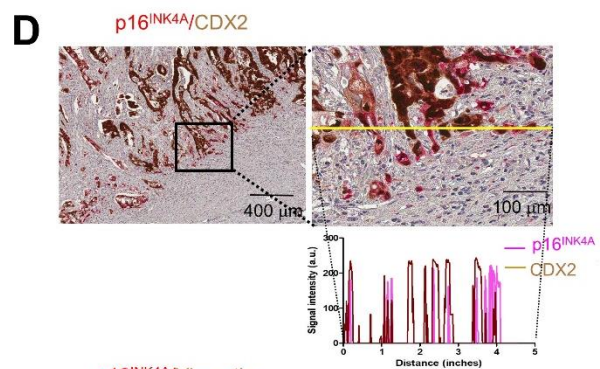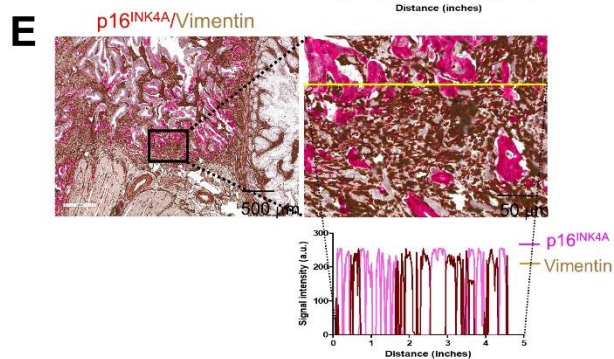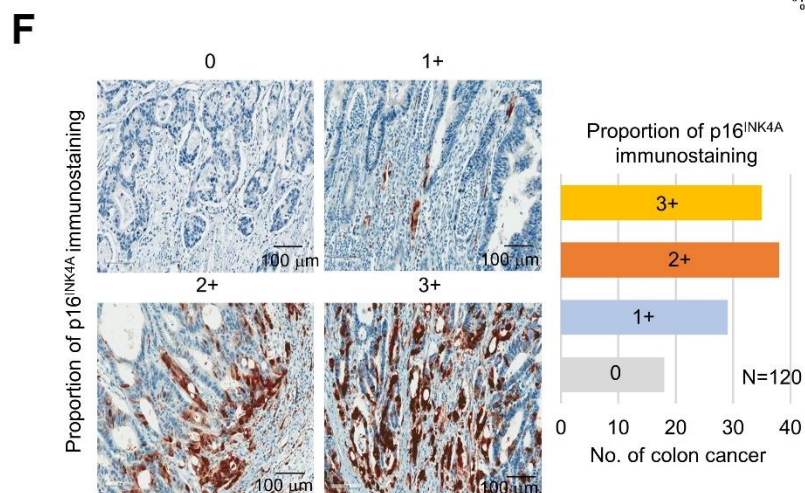

**Figure S1. Characterization of SA-β-Gal-positive tumor cells and adjacent stromal cells.**

**A)** SA-β-Gal-positive round-shaped cells (arrow) in the stromal region of CRC frozen tissues that were stained for SA-β-Gal/NFR. The upper and lower panels show the SA-β-Gal-negative and SA-β-Gal-positive areas, respectively. **B)** CRC tissues stained with p16<sup>INK4A</sup> (red)/Ki67 (brown). Ki67 positivity (proliferation activity) was analyzed in p16<sup>INK4A</sup> positive and negative CRC. **C)** p16<sup>INK4A</sup> positive and negative CRC tissues dissected serially and immunostained with p16<sup>INK4A</sup> and histone 3 K9 trimethyl (Trimethyl H3), respectively. **D, E)** CRC tissues stained with p16<sup>INK4A</sup> (red)/CDX2 (brown) (D) or p16<sup>INK4A</sup> (red)/vimentin (brown) (E). The red and brown color were extracted and the intensity of each splitted image was measured by Image J software. The values were presented as peak graphs. **F)** One hundred and twenty cases of MSS CRC were graded as 0, 1+, 2+, or 3+ according to the proportion of p16<sup>INK4A</sup>. The *p* value was calculated by Mann–Whitney U test (B). N indicated the number of cases.

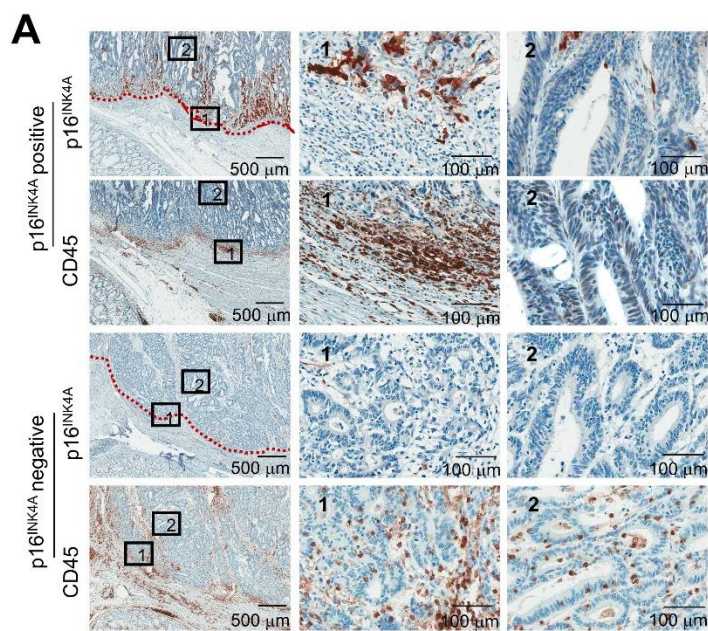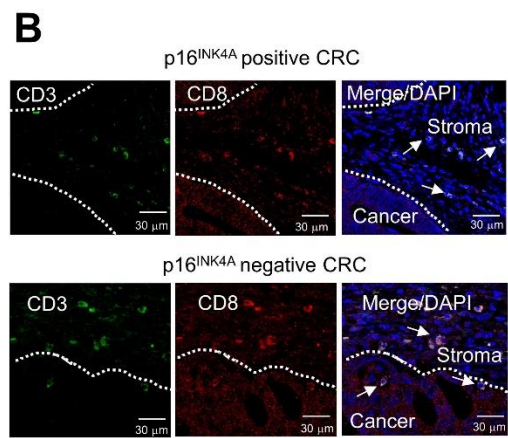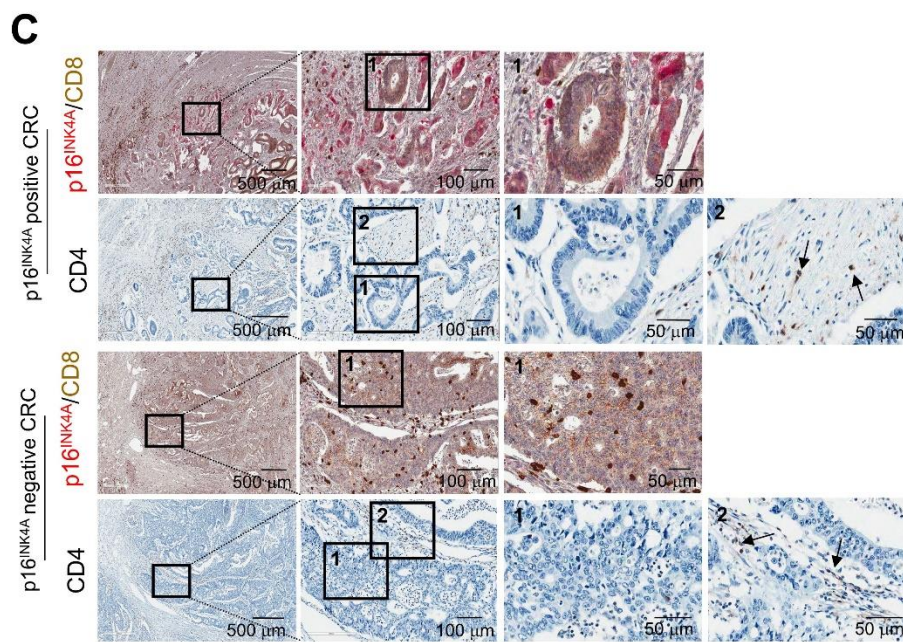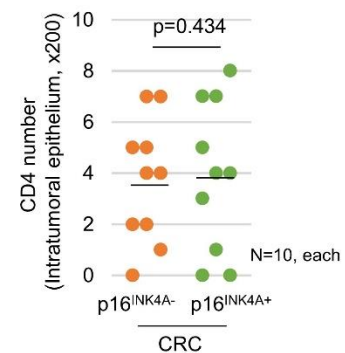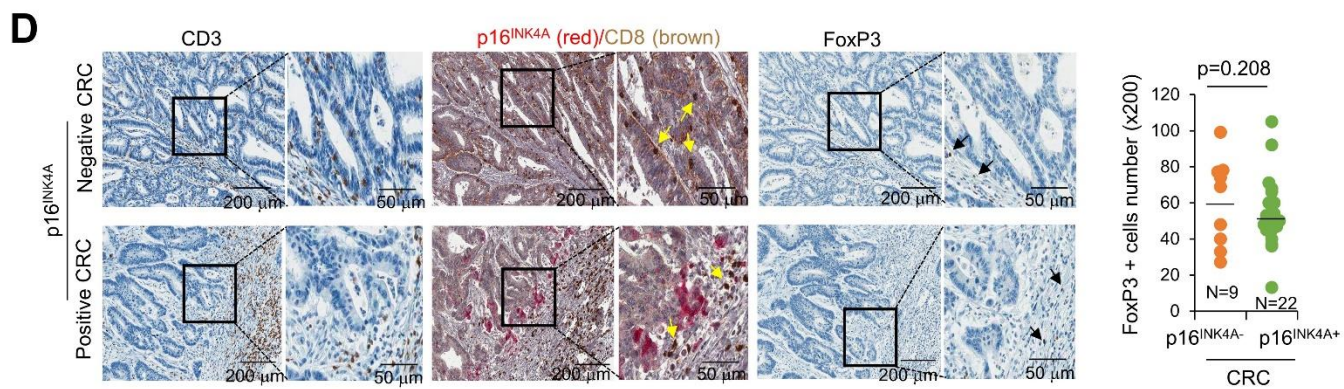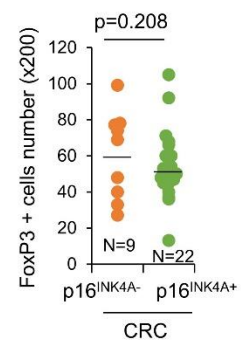

**Figure S2. Characterization of CRC stromal cells.** **A)** Infiltration of CD45 positive cells in p16<sup>INK4A</sup> positive and negative CRC. The center and the right columns show highly magnified views of the areas denoted as 1 and 2, respectively. The dotted line indicates the cancer margin. **B)** p16<sup>INK4A</sup> positive and negative CRC tissues were double immunofluorescence stained with CD3 and CD8. White arrows indicate CD3/CD8 double stained cells. **C)** p16<sup>INK4A</sup> positive and negative CRC tissues were dissected serially and stained with p16<sup>INK4A</sup>/CD8 or CD4, respectively. Arrows indicate CD4 positive cells. Intratumoral infiltrated CD4<sup>+</sup> T cell numbers were analyzed and presented as dot graph. **D)** p16<sup>INK4A</sup> positive and negative CRC tissues were stained with CD3, p16<sup>INK4A</sup> (red)/ CD8 (brown), and FoxP3, and the number of FoxP3 positive cells was counted (x200). Yellow and black arrows indicate CD8 and FoxP3 positive cells, respectively. The *p* value was calculated by Mann–Whitney U test (C, D). N indicated the number of cases.

**A**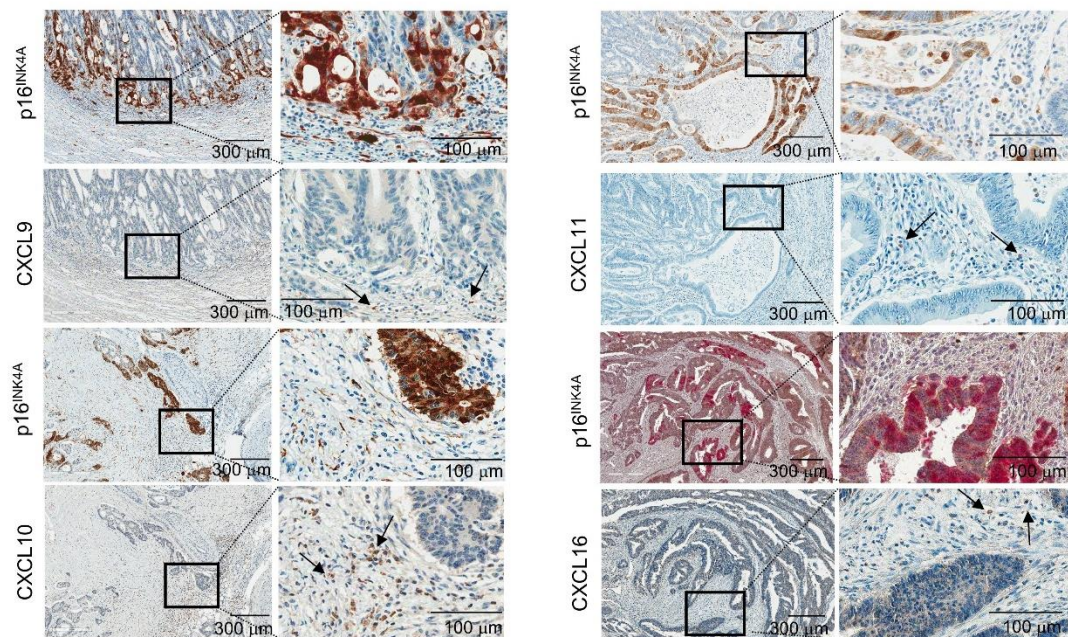**B**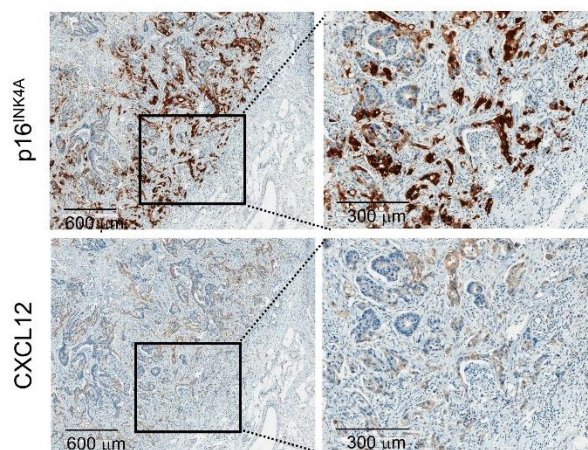**C**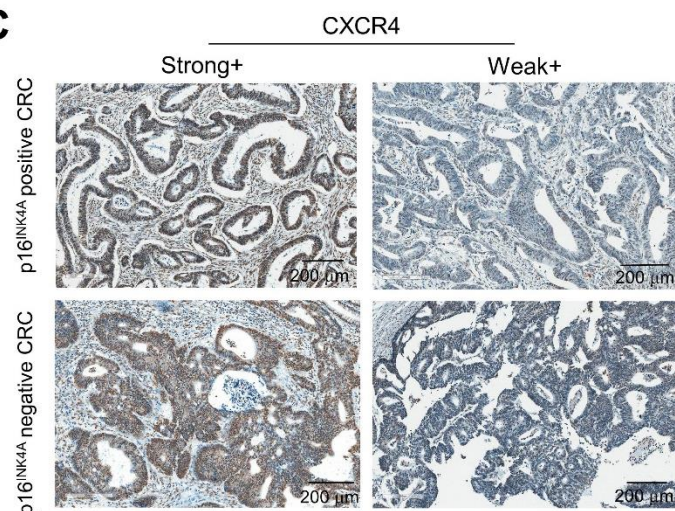**D**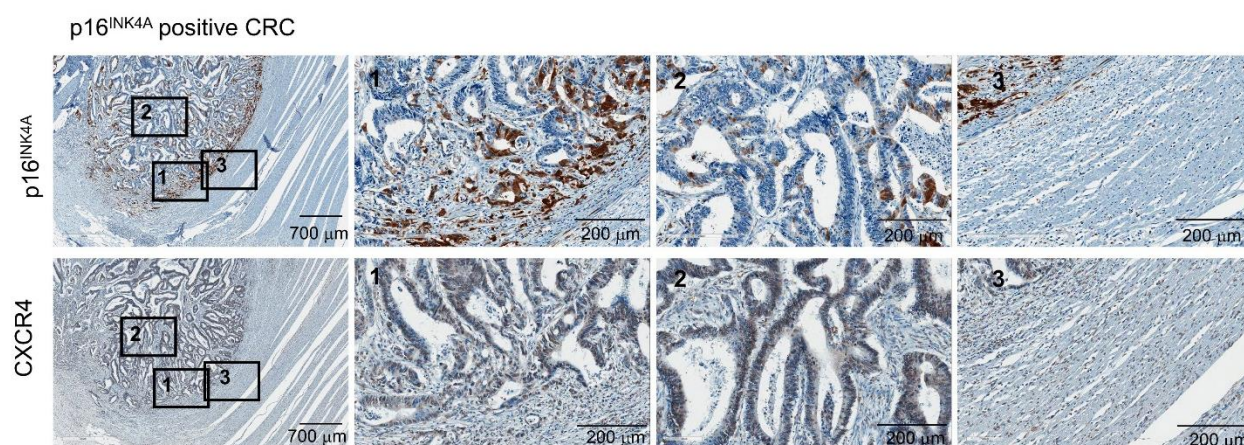

**Figure S3. T cell Chemokine and CXCR4 expression in CRC.** **A)** Immunostaining for p16<sup>INK4A</sup>, CXCL9, CXCL10, CXCL11, and CXCL16. p16<sup>INK4A</sup> positive CRC tissues were serially dissected and immunostained for p16<sup>INK4A</sup>, CXCL9, CXCL10, CXCL11, and CXCL16. The arrows indicate the CXCL9, CXCL10, CXCL11, and CXCL16 positive cells. **B)** CXCL12 expression in p16<sup>INK4A</sup> expressing senescent tumor cells. p16<sup>INK4A</sup> positive CRC tissues were serially dissected and stained with p16<sup>INK4A</sup> and CXCL12 antibody, respectively. **C)** p16<sup>INK4A</sup> positive and negative CRC tissues were stained with CXCR4 antibody and presented as strongly- and weakly-CXCR4 positive CRC. **D)** CXCR4 expression in p16<sup>INK4A</sup> expressing senescent tumor cells. p16<sup>INK4A</sup> positive CRC tissues were serially dissected and stained with p16<sup>INK4A</sup> and CXCR4 antibodies. “1”, “2”, and “3” indicate the high magnification views of the original figure.

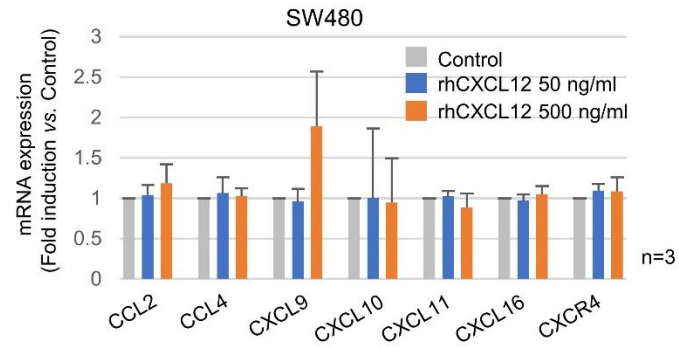

**Figure S4. T cell chemokine expression in SW480 cells after treatment of CXCL12.**

SW480 cells were treated with a low concentration (50 ng/ml) or a high concentration (500 ng/ml) of rhCXCL12 for 24 hours and then analyzed CXCL9, CXCL10, CXCL11, CXCL16, CCL2, CCL4, and CXCR4 mRNA expression by real time PCR. CCL3 and CCL5 was not detected.

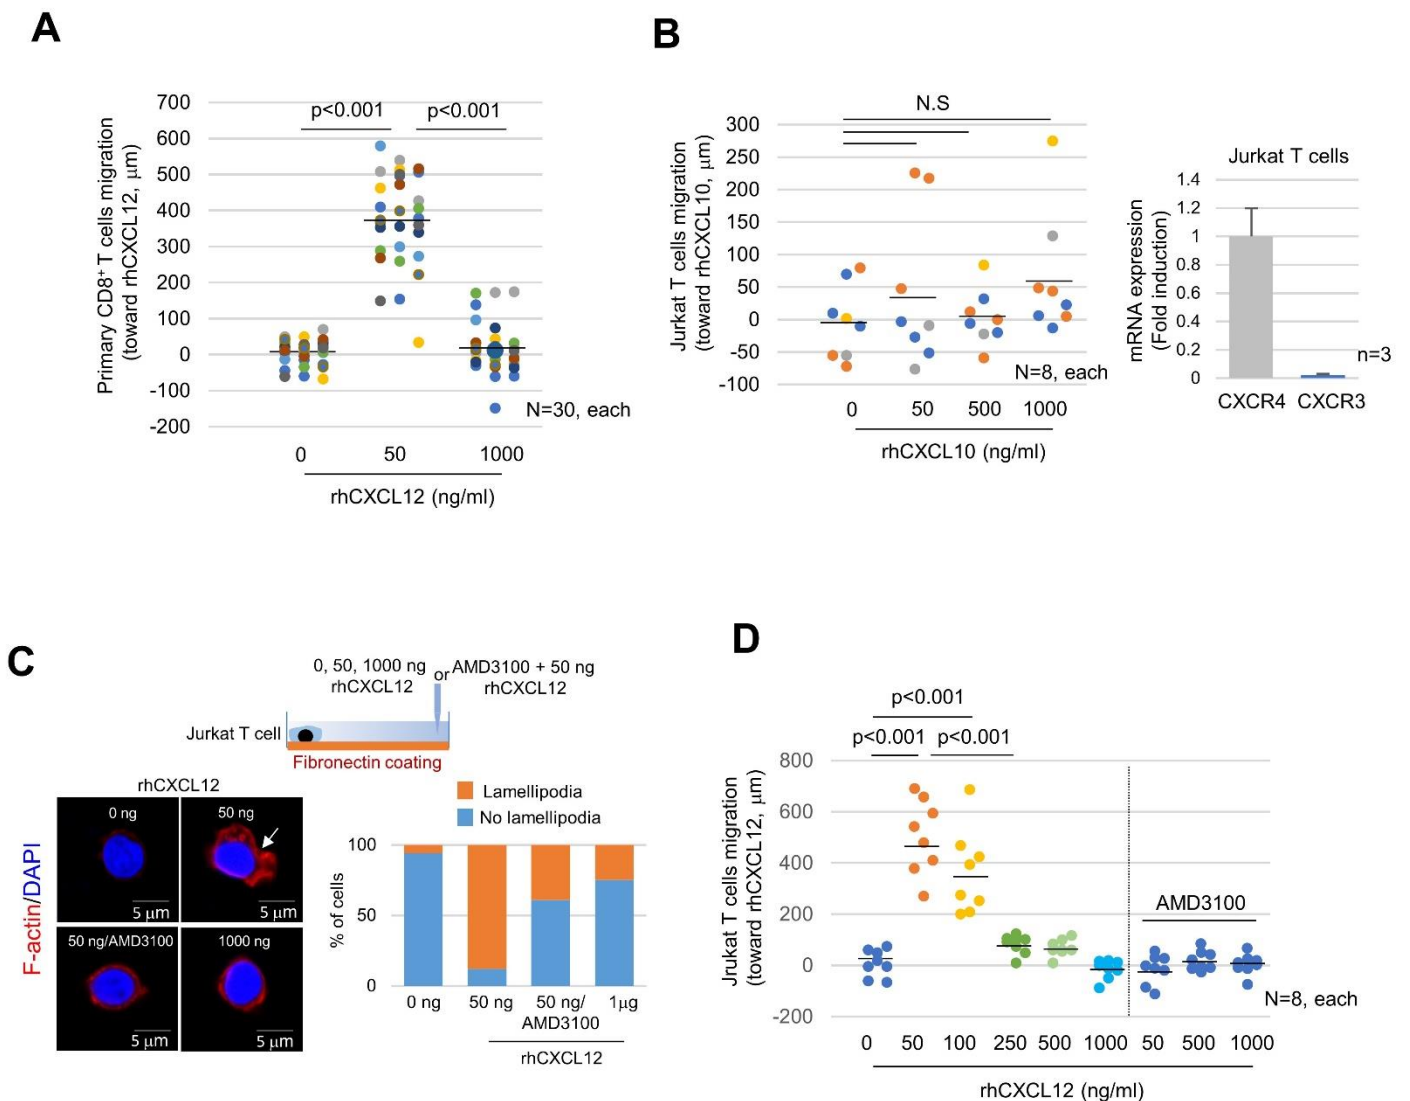

**Figure S5. Chemotaxis of primary CD8<sup>+</sup> T and Jurkat T cells.** **A)** CXCL12 chemogradient was developed using  $\mu$ -slide, and then isolated primary CD8<sup>+</sup> T cell migration was analyzed. The migrated T cells were tracked, and the migration distances were measured. The result is presented graphically. **B)** CXCL10 chemogradient was developed using  $\mu$ -slide, and then Jurkat T cell migration was analyzed. The migrated T cells were tracked, and the migration distances were measured. The result is presented graphically. CXCR4 and CXCR3 mRNA expression in Jurkat T cell was analyzed by real time PCR. **C)** Low (50 ng/ml) or high (1000

ng/ml) concentrations of rhCXCL12 were treated for 10 minutes and then analyzed for lamellipodia formation through F-actin staining. One hundred cells were counted and presented as a bar graph. The arrow indicates the lamellipodia. **D)** Titration of CXCL12. CXCL12 chemogradient was developed using  $\mu$ -slide and then Jurkat T cell migration was analyzed. In the case of AMD3100 treated groups, rhCXCL12 (50, 500, 1000 ng/ml) and AMD3100 (5  $\mu$ M) were cotreated and then T cells migration was measured. The migrated T cells were tracked, and the migration distances were measured, and the result is presented graphically.

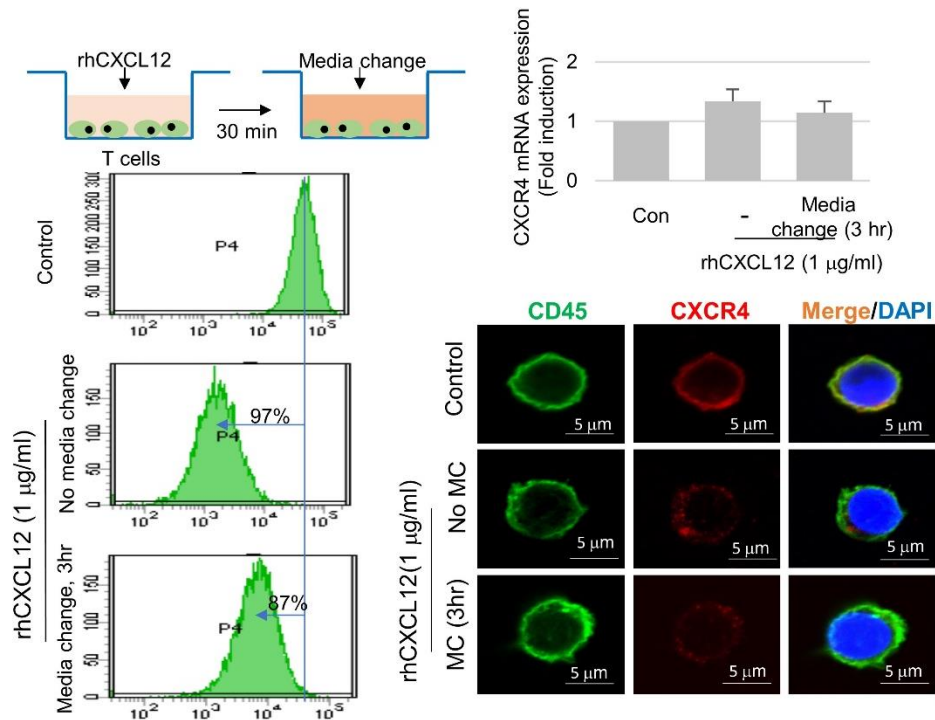

**Figure S6. Recovery rate of CXCR4 in the plasma membrane under high rhCXCL12 concentrations.** Jurkat T cells were treated with 1  $\mu$ g/ml rhCXCL12 for 30 minutes. The cells were washed and added to fresh media and maintained for 3 hours. CXCR4 expression was analyzed by FACS (left panel), mRNA (upper right panel), and immunocytochemistry (lower right panel). MC indicates media change.

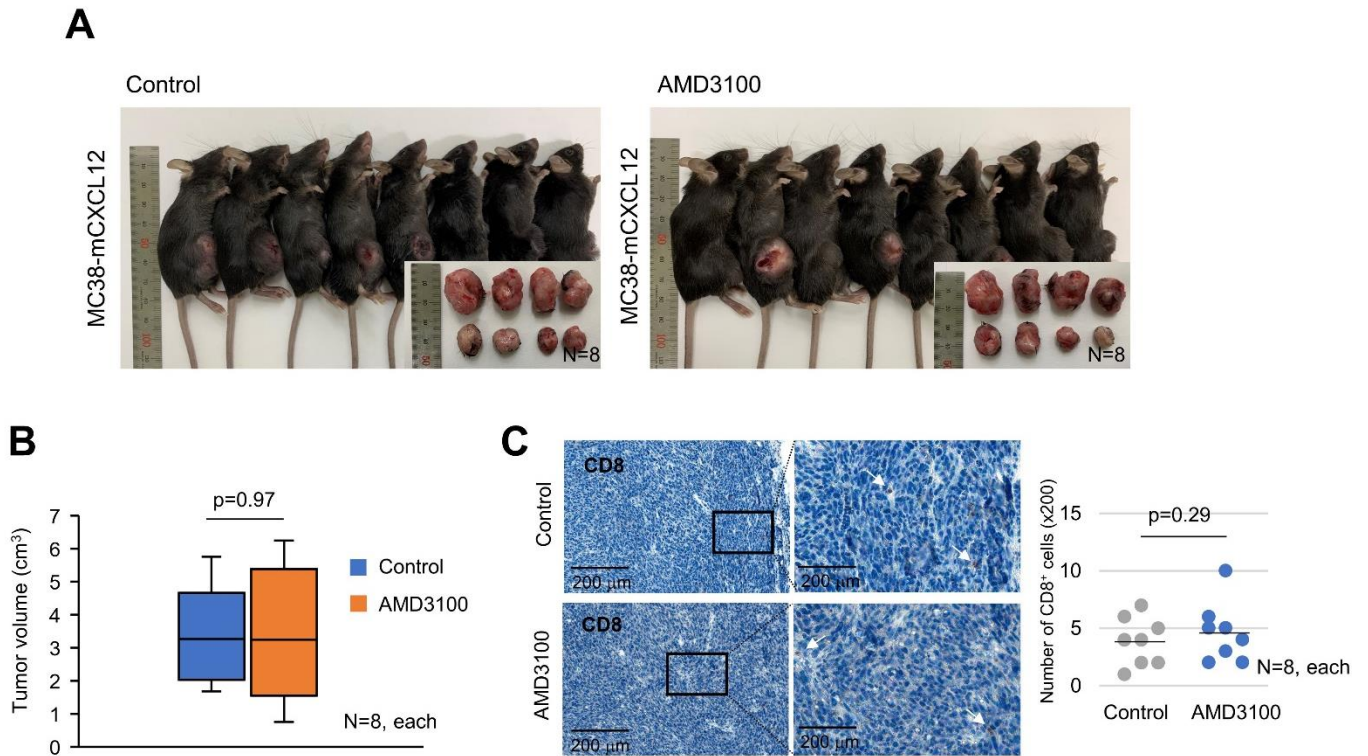

**Figure S7. Tumor volume analysis in mouse colon cancer allograft model with mCXCL12 overexpressing MC38 cells after AMD3100 treatment.** **A)** mCXCL12 overexpressing MC38 cells were transplanted into 7-week-old C57BL/6 mice. One week later, the mice were treated with AMD3100 (3 mg/kg) through intraperitoneal injection every day for two weeks. The mice were euthanized after three weeks, and the tumor size was analyzed. **B)** The final tumor volume was presented as a Box-and-Whisker diagram. The line inside the box is median. The top and the bottom of the box are the 75% and 25% percentile, respectively. Error bars on the whiskers represent minimum to maximum. **C)** To measure the number of tumor infiltrating T cells, three randomly selected areas of the tumor tissue per animal were photographed and then analyzed for CD8<sup>+</sup> cell infiltration; the results were averaged and presented as a dot graph. The *p* value was calculated by Mann–Whitney U test. N indicated the number of cases. The white arrow indicates the CD8<sup>+</sup> cells.

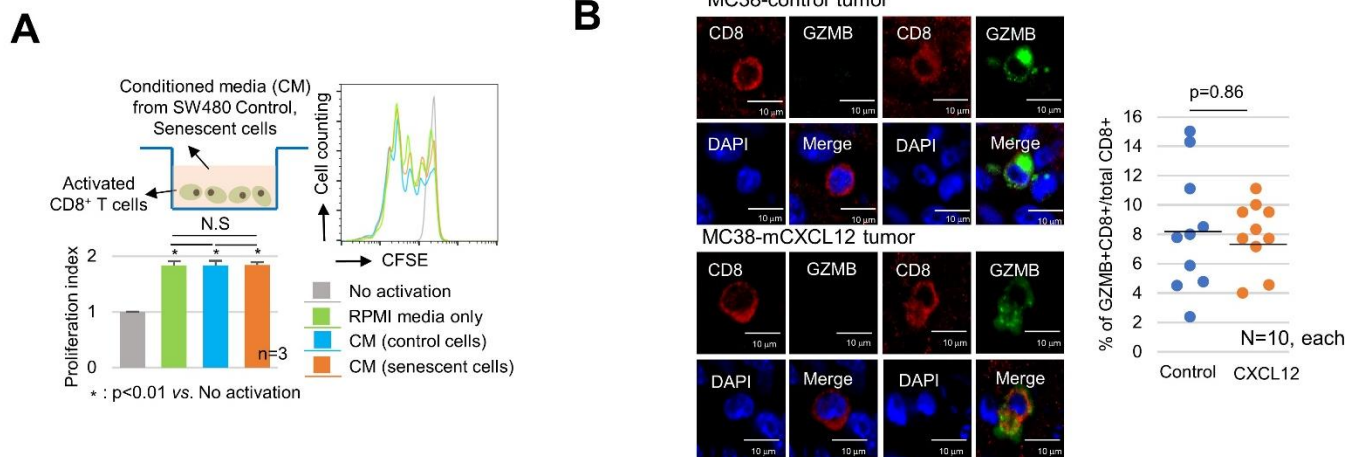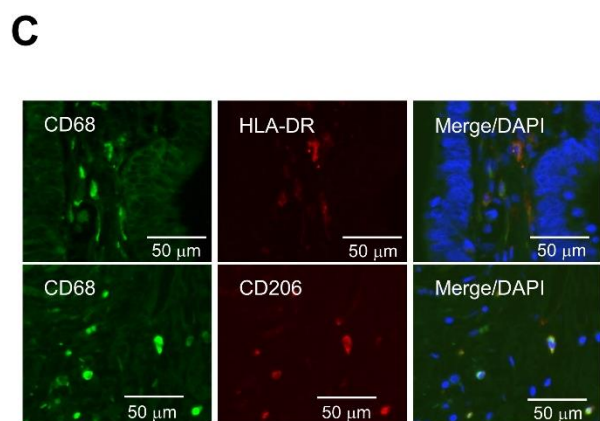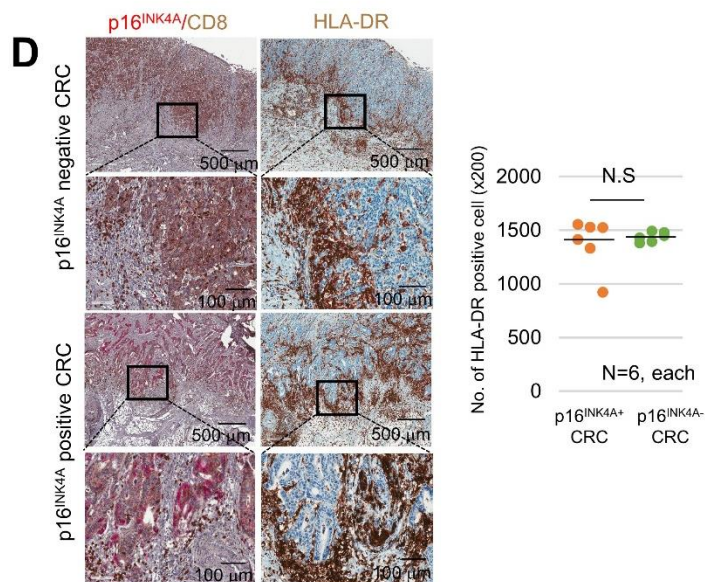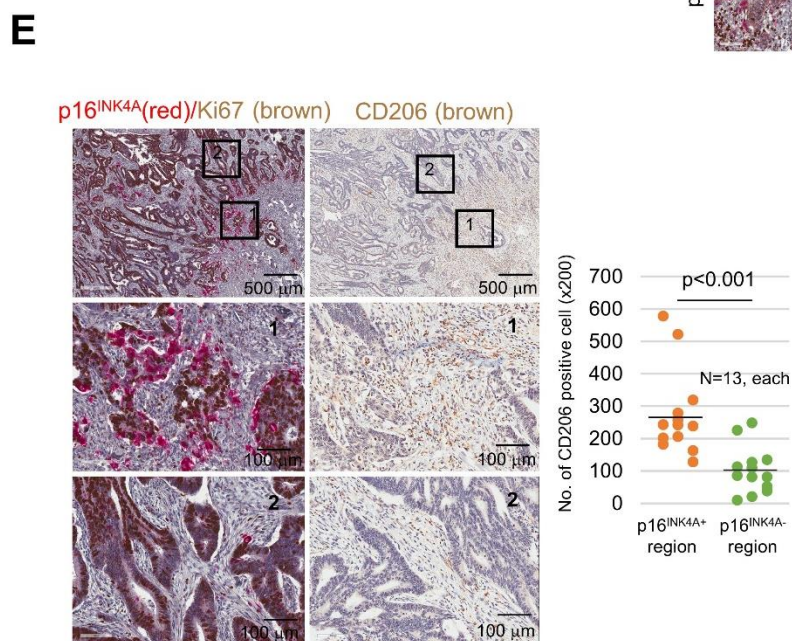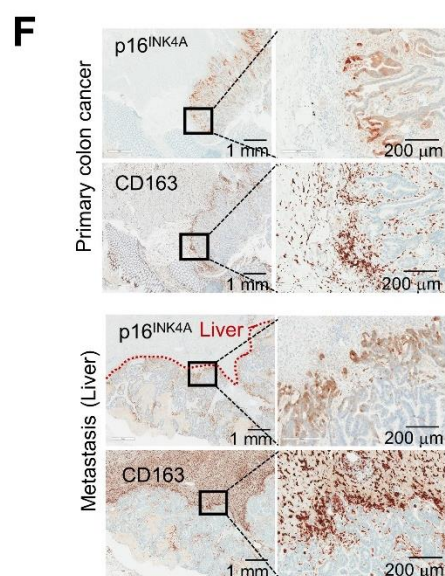

**Figure S8. Characterization of macrophages associated with senescent tumor cells.** **A)** T cell proliferation assay. CFSE-labelled CD8<sup>+</sup> T cell activation by anti-CD3/CD28 beads was performed using the CM from SW480 or SW480/ROS for 72 hours. Dilution of CFSE was measured by flow cytometry and proliferation index was subsequently calculated. The *p* value was calculated by one-way ANOVA and post hoc analysis. **B)** Granzyme B (GZMB)/CD8 double immunostaining was performed on the MC38-control and on the MC38-mCXCL12 overexpressing tumor (Figure 3F), and the percentage of double positive cells were counted and presented as a dot graph. **C)** CRC tissues were immunostained for CD206 or HLA-DR with CD68, respectively. **D)** Macrophage distribution analysis with HLA-DR in p16<sup>INK4A</sup> positive or negative CRC. Three randomly selected areas of the tumor tissue were photographed (×200) and then analyzed for HLA-DR positive cell. The results were averaged and then presented as a dot graph. **E)** CD206-positive cell distribution in p16<sup>INK4A</sup> positive CRC. Colon cancer tissues were serially dissected and stained with p16<sup>INK4A</sup>, Ki67 and CD206. The '1' and '2' indicate the high magnification views of the original figure. Three randomly selected areas were photographed (×200) and then analyzed for CD206 positive cell. The results were averaged and then presented as a dot graph. **F)** Primary colon cancer and liver metastatic region were immunostained with p16<sup>INK4A</sup> and CD163. The dotted line indicates the cancer margin. The *p* value was calculated by Mann–Whitney U test (B, D, and, E). N indicated the number of cases.

**A**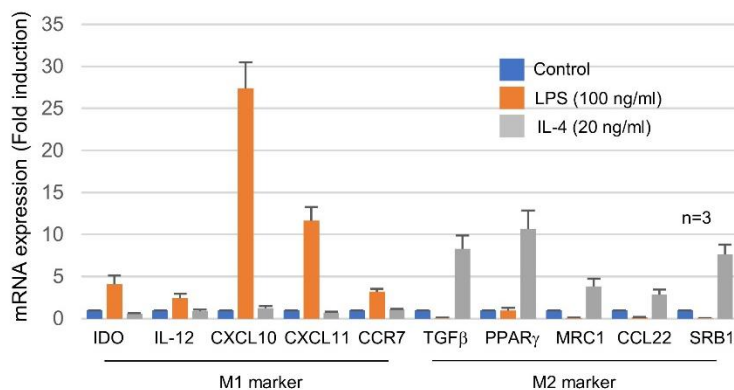**B**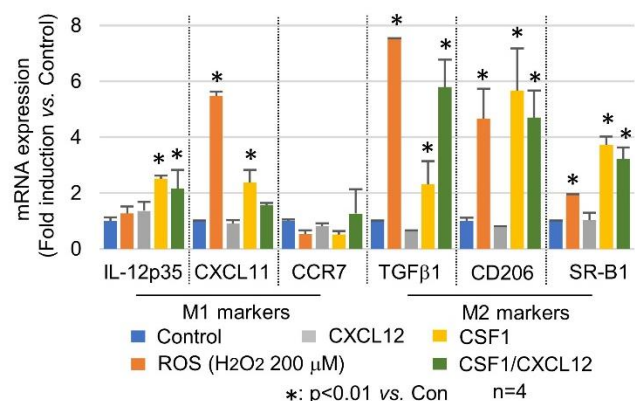**C**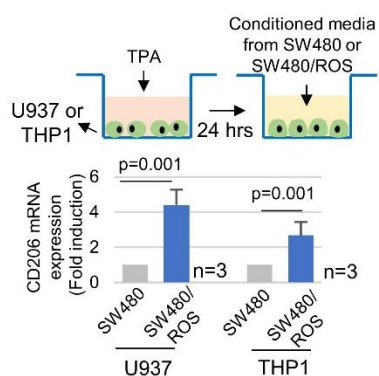**D**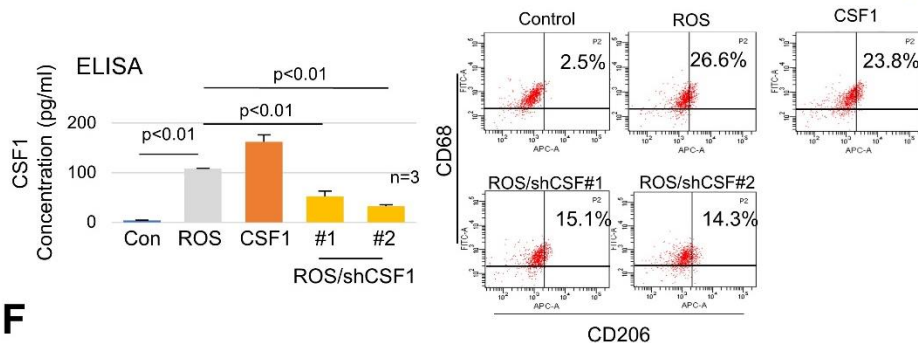**F**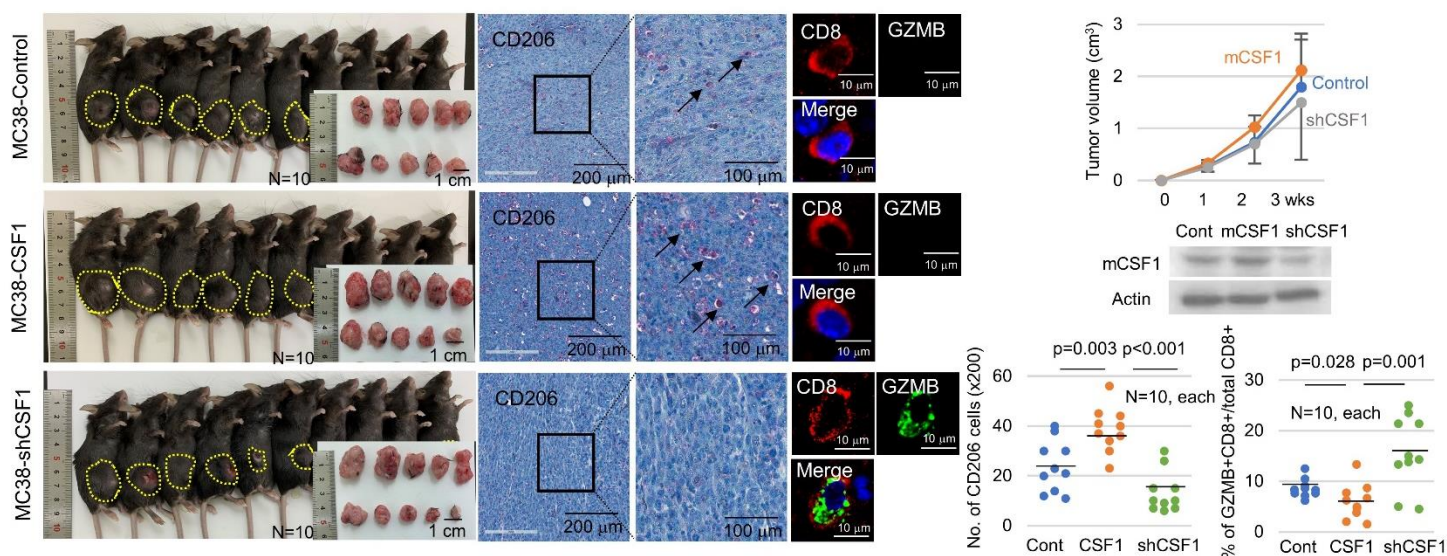

**Figure S9. Senescent tumor cells polarize monocytes to M2 macrophages.** **A)** LPS and IL4 polarized monocytes to M1 and M2 macrophages, respectively. Isolated primary monocytes were treated with LPS (100 ng/ml) or IL4 (20 ng/ml) for three days and M1 and M2 macrophage markers were analyzed by real time PCR. **B)** Isolated primary monocytes were cocultured with SW480 (control, H<sub>2</sub>O<sub>2</sub> treated, CSF1 overexpressing, and CXCL12 overexpressing) for six days and then analyzed for macrophage markers by real time PCR. **C)** Senescent tumor cells induced M2 macrophage differentiation in U937 and THP1 cells. U937 or THP1 cells were treated with TPA for 24 hours, and then the media were replaced with CM from SW480 or H<sub>2</sub>O<sub>2</sub> treated SW480 cells. U937 and THP1 cells were maintained for 3 days and then analyzed for CD206 expression by real time PCR. The *p* value was calculated using Mann–Whitney U test. **D, E)** Two kinds of shCSF1 lentivirus infected ROS treated SW480 cells were cocultured with isolated primary monocytes for six days. The cells were analyzed for CD206 expression by FACS (**D**) and the macrophage markers by real time PCR (**E**). **F)** CSF1 regulate CD8<sup>+</sup> T cell activation in the animal model. Control, mouse CSF1 overexpressing, or mouse CSF1 knockdown MC38 cells (1×10<sup>6</sup>) were transplanted into female C57BL/6 mice and maintained for three weeks with the tumor growth analysis (upper right panel). Tumor volume was presented as mean ± SD with a line graph. The mice were euthanized, and macrophage differentiation was analyzed with CD206 immunohistochemistry. CD8<sup>+</sup> T cell activation was analyzed with GZMB and presented as a percentage of GZMB<sup>+</sup>/CD8<sup>+</sup> per total CD8<sup>+</sup>. CSF1 protein expression was analyzed by western blot. The *p* value was calculated using Kruskal Wallis test (**B, D, E, and F**). *N* and *n* indicated the number of cases and independent experiments, respectively.

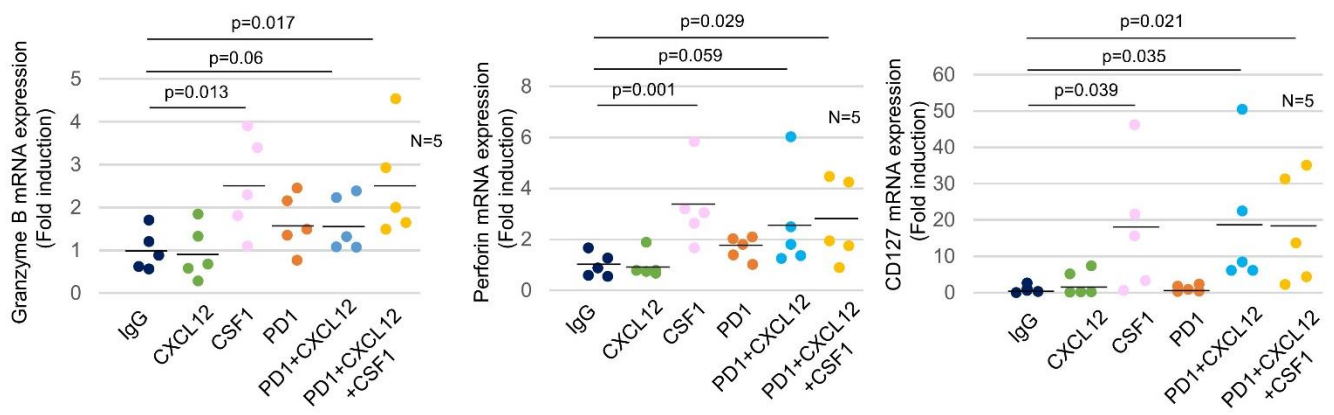

**Figure S10. Analysis of gene expression associated activated T cell.** Granzyme B, perforin, and CD127 mRNA expression was analyzed in tumors from mCXCL12 overexpressing MC38 cells bearing mice (Figure 6C) by real time PCR and presented as fold induction compared with those of IgG injected mice.

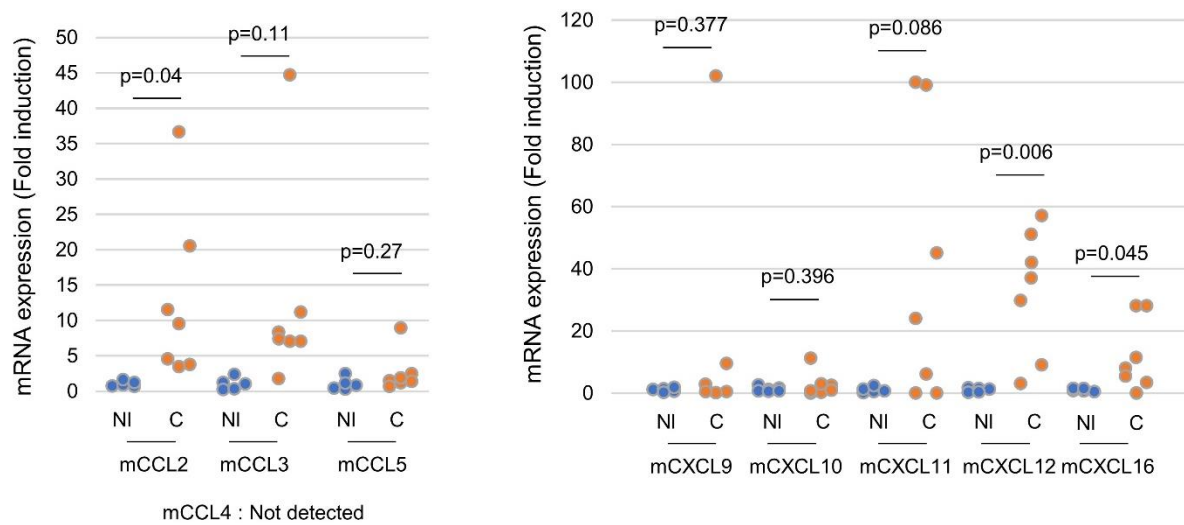

**Figure S11. T cell Chemokine expression in AOM/DSS-induced mouse CRC.** mRNA expression of T cell chemokines was analyzed in normal colon (NI, N=5) and AOM/DSS induced mouse CRC (C, N=7) by real time PCR and presented as fold induction compared with those of normal colon.

**A**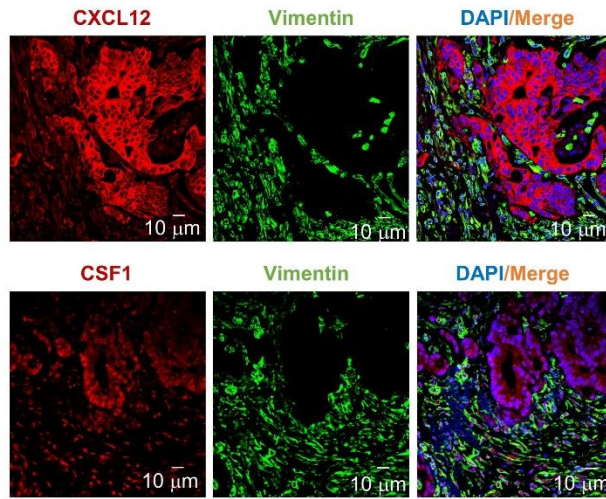**B**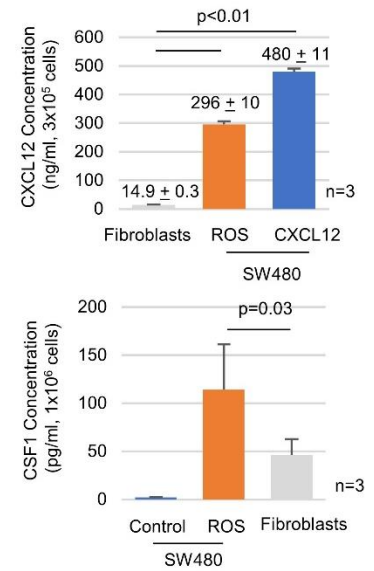**C**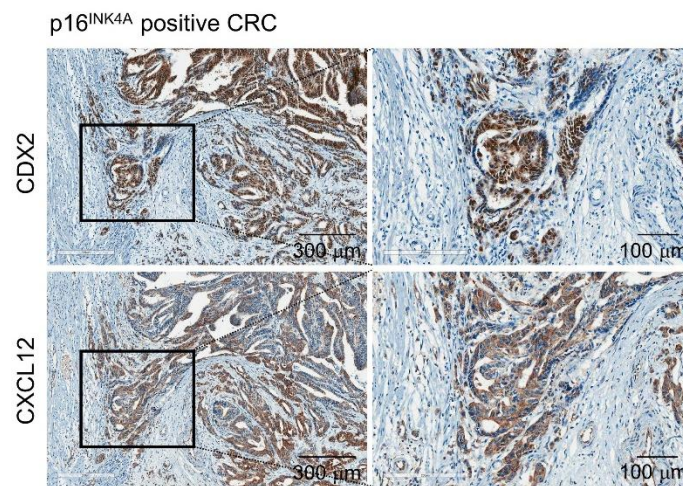**D**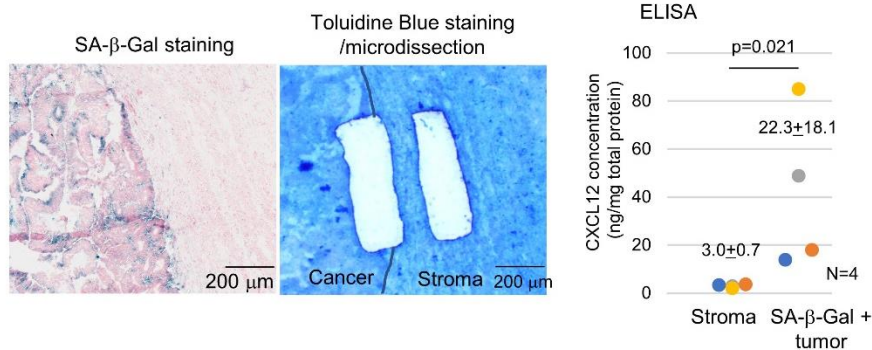**E**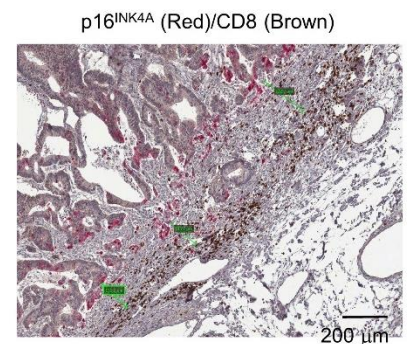

**Figure S12. Expression of CXCL12 and the distance between senescent tumor cells and CD8<sup>+</sup> T cells in p16<sup>INK4A</sup> positive CRC.** **A)** Analysis of CXCL12 and CSF1 expression in the cancer epithelial cells and stromal cells (fibroblasts) of p16<sup>INK4A</sup> positive CRC. Double immunostaining highlighted CXCL12 or CSF1 expression in cancer (vimentin negative) and stromal (vimentin positive) cells (left panel). **B)** ELISA analysis of CXCL12 or CSF1 in isolated fibroblast and ROS induced SW480 senescent cells. **C)** p16<sup>INK4A</sup> positive CRC was dissected serially and stained with CDX2 and CXCL12, respectively. **D)** ELISA analysis of CXCL12 in the p16<sup>INK4A</sup> positive tumor epithelial region and adjacent stromal region individually isolated by microdissection (N=4). **E)** The distance between senescent tumor cells (red) and CD8<sup>+</sup> T cells (brown). Three points were measured using Aperio ImageScope viewing software (Leica Biosystems). The *p* value was calculated using Kruskal Wallis test (B) or Mann–Whitney U test (D). N and n indicated the number of cases and independent experiments, respectively.

**A**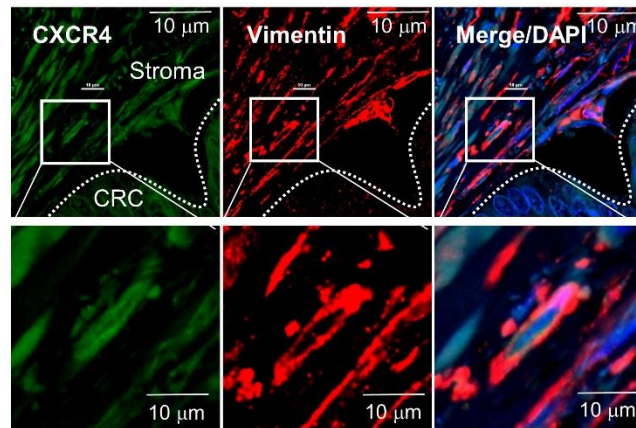**B**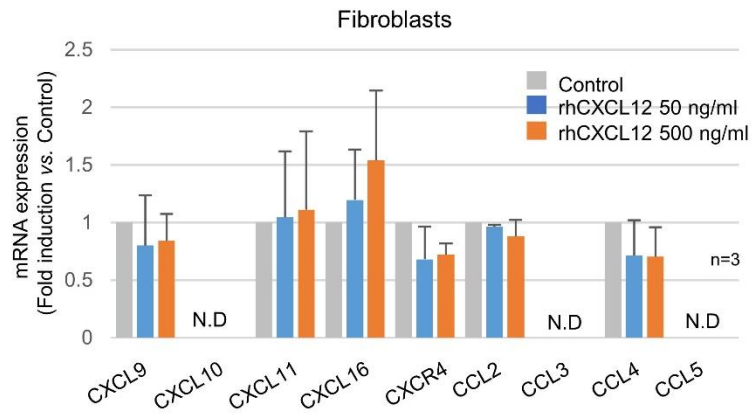

**Figure S13. CXCR4 expression in stromal fibroblasts.** **A)** CRC was double stained with CXCR4 (green) and vimentin (red). **B)** Fibroblasts were treated with a low concentration (50 ng/ml) or high concentration (500 ng/ml) of rhCXCL12 for 24 hours and then analyzed CXCL9, CXCL10, CXCL11, CXCL16, CCL2, CCL4, and CXCR4 mRNA expression by real time PCR.

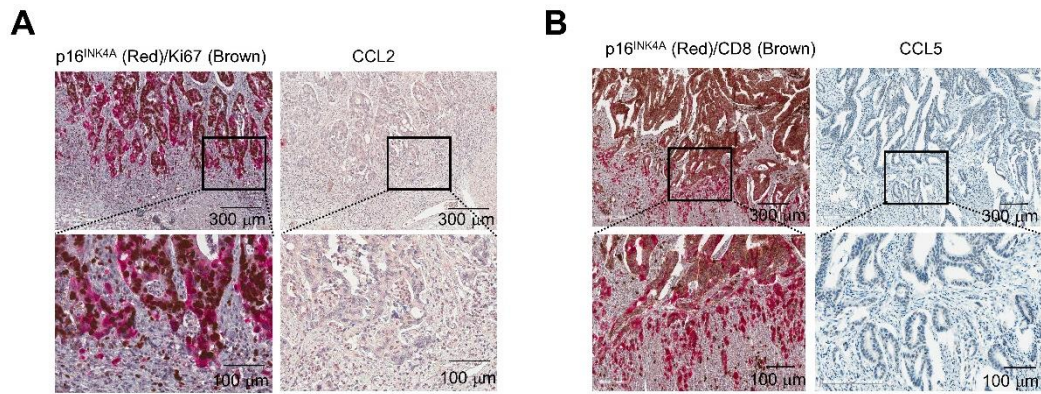

**Figure S14. CCL2 and CCL5 expression in CRC.** A, B) p16<sup>INK4A</sup> positive CRC was dissected serially and stained with p16<sup>INK4A</sup>/CCL2 (A) and p16<sup>INK4A</sup>/CCL5 (B), respectively.

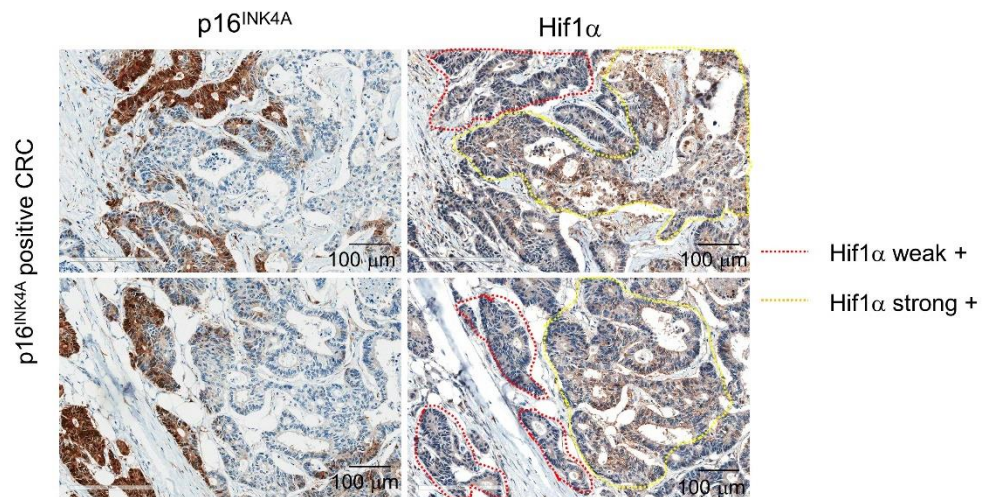

**Figure S15. Hif1α expression in CRC.** p16<sup>INK4A</sup> positive CRC was dissected serially and stained with p16<sup>INK4A</sup> and Hif1α, respectively. Red and yellow dot line indicate Hif1α weak and strong stained area, respectively.

**Table S1. Clinicopathological characteristics of patients according to p16<sup>INK4A</sup> expression**

| Characteristics                          | All cases (n=130)                              |           |           |           |        | MSS cases (n=120)                              |           |           |           |        |
|------------------------------------------|------------------------------------------------|-----------|-----------|-----------|--------|------------------------------------------------|-----------|-----------|-----------|--------|
|                                          | p16 <sup>INK4A</sup> expression (grade), N (%) |           |           |           | p      | p16 <sup>INK4A</sup> expression (grade), N (%) |           |           |           | p      |
|                                          | 0                                              | 1         | 2         | 3         |        | 0                                              | 1         | 2         | 3         |        |
| Age (years)                              |                                                |           |           |           |        |                                                |           |           |           |        |
| < 60                                     | 4 (22.2)                                       | 12 (35.3) | 18 (46.2) | 14 (35.9) | 0.369  | 4 (22.2)                                       | 10 (34.5) | 18 (47.4) | 13 (37.1) | 0.257  |
| ≥ 60                                     | 14 (77.8)                                      | 22 (64.7) | 21 (53.8) | 25 (64.1) |        | 14 (77.8)                                      | 19 (65.5) | 20 (52.6) | 22 (62.9) |        |
| Gender                                   |                                                |           |           |           |        |                                                |           |           |           |        |
| Female                                   | 7 (38.9)                                       | 10 (29.4) | 22 (56.4) | 18 (46.2) | 0.13   | 7 (38.9)                                       | 8 (27.6)  | 21 (55.3) | 17 (48.6) | 0.144  |
| Male                                     | 11 (61.1)                                      | 24 (70.6) | 17 (43.6) | 21 (53.8) |        | 11 (61.1)                                      | 21 (72.4) | 17 (44.7) | 18 (51.4) |        |
| Tumor location                           |                                                |           |           |           |        |                                                |           |           |           |        |
| Right                                    | 2 (11.1)                                       | 5 (14.7)  | 8 (20.5)  | 6 (15.4)  | 0.818  | 2 (11.1)                                       | 4 (13.8)  | 7 (18.4)  | 6 (17.1)  | 0.508  |
| Left                                     | 16 (88.9)                                      | 29 (85.3) | 31 (79.5) | 33 (84.6) |        | 16 (88.9)                                      | 25 (86.2) | 31 (81.6) | 29 (82.9) |        |
| Tumor size                               |                                                |           |           |           |        |                                                |           |           |           |        |
| < 4 cm                                   | 5 (27.8)                                       | 9 (26.5)  | 11 (28.2) | 10 (25.6) | 1.000  | 5 (27.8)                                       | 8 (27.6)  | 11 (28.9) | 9 (25.7)  | 0.883  |
| ≥ 4 cm                                   | 13 (72.2)                                      | 25 (73.5) | 28 (71.8) | 29 (74.4) |        | 13 (72.2)                                      | 21 (72.4) | 27 (71.1) | 26 (74.3) |        |
| T stage                                  |                                                |           |           |           |        |                                                |           |           |           |        |
| pT1, 2                                   | 3 (16.7)                                       | 7 (20.6)  | 2 (5.1)   | 3 (7.7)   | 0.088  | 3 (16.7)                                       | 6 (20.7)  | 2 (5.3)   | 3 (8.6)   | 0.132  |
| pT3, 4                                   | 15 (83.3)                                      | 27 (79.4) | 37 (94.9) | 36 (92.3) |        | 15 (83.3)                                      | 23 (79.3) | 36 (94.7) | 32 (91.4) |        |
| N stage                                  |                                                |           |           |           |        |                                                |           |           |           |        |
| pN0, N1                                  | 14 (77.8)                                      | 27 (79.4) | 27 (69.2) | 20 (51.3) | 0.011  | 14 (77.8)                                      | 22 (75.9) | 26 (68.4) | 18 (51.4) | 0.025  |
| pN2                                      | 4 (22.2)                                       | 7 (20.6)  | 12 (30.8) | 19 (48.7) |        | 4 (22.2)                                       | 7 (24.1)  | 12 (31.6) | 17 (48.6) |        |
| M stage                                  |                                                |           |           |           |        |                                                |           |           |           |        |
| M0                                       | 16 (88.9)                                      | 29 (85.3) | 31 (79.5) | 30 (76.9) | 0.210  | 16 (88.9)                                      | 24 (82.8) | 30 (78.9) | 27 (77.1) | 0.289  |
| M1                                       | 2 (11.1)                                       | 5 (14.7)  | 8 (20.5)  | 9 (23.1)  |        | 2 (11.1)                                       | 5 (17.2)  | 8 (21.1)  | 8 (22.9)  |        |
| TNM stage                                |                                                |           |           |           |        |                                                |           |           |           |        |
| I, II                                    | 12 (66.7)                                      | 18 (52.9) | 15 (38.5) | 14 (35.9) | 0.017  | 12 (66.7)                                      | 14 (48.3) | 14 (36.8) | 14 (40.0) | 0.064  |
| III, IV                                  | 6 (33.3)                                       | 16 (47.1) | 24 (61.5) | 25 (64.1) |        | 6 (33.3)                                       | 15 (51.7) | 24 (63.2) | 21 (60.0) |        |
| Tumoral immune infiltration <sup>a</sup> |                                                |           |           |           |        |                                                |           |           |           |        |
| Weak                                     | 1 (5.6)                                        | 3 (8.8)   | 11 (28.2) | 21 (53.8) | <0.001 | 1 (5.6)                                        | 3 (10.3)  | 11 (28.9) | 17 (48.6) | <0.001 |
| Moderate, strong                         | 17 (94.4)                                      | 31 (91.2) | 28 (71.8) | 18 (46.2) |        | 17 (94.4)                                      | 26 (89.7) | 27 (71.1) | 18 (51.4) |        |
| Lymphatic invasion                       |                                                |           |           |           |        |                                                |           |           |           |        |
| No                                       | 12 (66.7)                                      | 18 (52.9) | 22 (56.4) | 17 (43.6) | 0.399  | 12 (66.7)                                      | 13 (44.8) | 21 (55.3) | 14 (40.0) | 0.243  |
| Yes                                      | 6 (33.3)                                       | 16 (47.1) | 17 (43.6) | 22 (56.4) |        | 6 (33.3)                                       | 16 (55.2) | 17 (44.7) | 21 (60.0) |        |
| Venous invasion                          |                                                |           |           |           |        |                                                |           |           |           |        |
| No                                       | 16 (88.9)                                      | 33 (97.1) | 34 (87.2) | 36 (92.3) | 0.429  | 16 (88.9)                                      | 28 (96.6) | 33 (86.8) | 32 (91.4) | 0.531  |
| Yes                                      | 2 (11.1)                                       | 1 (2.9)   | 5 (12.8)  | 3 (7.7)   |        | 2 (11.1)                                       | 1 (3.4)   | 5 (13.2)  | 3 (8.6)   |        |
| Perineural invasion                      |                                                |           |           |           |        |                                                |           |           |           |        |
| No                                       | 15 (83.3)                                      | 30 (88.2) | 26 (66.7) | 24 (61.5) | 0.030  | 15 (83.3)                                      | 25 (86.2) | 25 (65.8) | 21 (60.0) | 0.054  |
| Yes                                      | 3 (16.7)                                       | 4 (11.8)  | 13 (33.3) | 15 (38.5) |        | 3 (16.7)                                       | 4 (13.8)  | 13 (34.2) | 14 (40.0) |        |

N: number, MSS: microsatellite stable

P values were calculated using the  $\chi^2$  test

<sup>a</sup>defined as follows: weak = presence of immune cells occupying < 10 % of the cancer tissue, moderate = presence of immune cells occupying 10 to 30 % of the cancer tissue, strong = immune cells occupying > 30% of the cancer tissue.

**Table S2. Distribution of RAS/BRAF, PIK3CA, TP53, and APC mutations according to p16<sup>INK4A</sup> expression**

| Mutated genes                | p16 <sup>INK4A</sup> expression (grade), <i>N</i> (%) |             |              |              | <i>p</i> |
|------------------------------|-------------------------------------------------------|-------------|--------------|--------------|----------|
|                              | 0                                                     | 1           | 2            | 3            |          |
| <i>RAS/BRAF</i> <sup>a</sup> | 2/6 (33.3)                                            | 4/13 (30.8) | 13/24 (54.2) | 11/21 (52.4) | 0.454    |
| <i>PIK3CA</i>                | 1/4 (25.0)                                            | 1/6 (16.7)  | 1/13 (7.7)   | 4/14 (28.6)  | 0.535    |
| <i>TP53</i>                  | 3/4 (75.0)                                            | 2/6 (33.3)  | 10/13 (76.9) | 9/14 (64.3)  | 0.315    |
| <i>APC</i>                   | 2/4 (50.0)                                            | 5/6 (83.3)  | 6/13 (46.2)  | 8/14 (57.1)  | 0.458    |

N: number

*P* values were calculated using the  $\chi^2$  test

<sup>a</sup>Including *KRAS* (62 cases), *NRAS* (1 case), and *BRAF* (1 case) mutations.

## Supplementary materials

**Movie S1. Jurkat T cell migration in the presence of rhCXCL12.** CXCL12 chemo-gradient was developed using  $\mu$ -Slide and analyzed Jurkat T cell migration. The live cell imaging was recorded for 24 hrs on a JuLi stage system operating on a CO<sub>2</sub> incubator.

**Movie S2. Jurkat T cell migration in the presence of CXCL12 expressing cells.** CXCL12 chemogradient was developed by CXCL12 overexpressing SW480 cells in  $\mu$ -Slide and then analyzed T cell migration. The live cell imaging was recorded for 8 hrs on a JuLi stage system operating on a CO<sub>2</sub> incubator.

**Movie S3. Lamellipodia formation in low concentration of rhCXCL12.** Jurkat T cells were treated with 0, 50 or 1,000 ng/ml rhCXCL12 in  $\mu$ -Slide and analyzed lamellipodia formation with SiR-actin staining. The live cell imaging was recorded for 10 min on confocal microscope (Nikon) with a x60 oil objective and a temperature-controlled chamber (37°C, 5% CO<sub>2</sub>).
